# Supplementary material
Source: publisher figshare collection journal article supplement (https://karger.figshare.com/ndownloader/files/27358181)
Supplement: Supplementary file 1 [file 27358181]

# Supplementary Material

**Table S1. Type of surgery**

| **Surgery** | **AKI (n=10)** | **No-AKI (n=42)** | **P-value** |
| --- | --- | --- | --- |
| Cardiac surgery | 4 (40.00%) | 19 (45.24%) | 0.447 (Fisher’s exact test) |
| Gastro-intestinal surgery | 0 (0%) | 3 (7.14%) |
| Hepatobiliary surgery | 0 (0%) | 4 (9.52%) |
| Thoracic surgery | 3 (30.00%) | 11 (26.19%) |
| Trauma surgery | 0 (0%) | 2 (4.76%) |
| Vascular surgery | 3 (30%) | 3 (7.14%) |

*AKI = acute kidney injury; No-AKI = no acute kidney injury*
